# Supplementary material for: Characterization and assessment of cleaning systems based on fatty acid methyl esters (FAMEs) for the removal of wax-based coatings from cultural heritage objects
Source: Royal Society of Chemistry journal article supplement (doi:10.1039/d4ma00781f), 2024-01-01

## Supplementary materials

**Table 1s.** Technical photography in visible diffused light (VIS) and ultraviolet light with a wavelength of 365 nm (UV): marble coated with the microcrystalline wax R21. CS: cleaning system.

| CS      | Sample with R21 microcrystalline wax                                                |                                                                                     | After cleaning                                                                       |                                                                                       |
|---------|-------------------------------------------------------------------------------------|-------------------------------------------------------------------------------------|--------------------------------------------------------------------------------------|---------------------------------------------------------------------------------------|
|         | VIS                                                                                 | UV                                                                                  | VIS                                                                                  | UV                                                                                    |
| MH      |    |    |    |    |
| MO      |   |   |   |   |
| ML      |  |  |  |  |
| MM      |  |  |  |  |
| MO<br>L |  |  |  |  |

|     |                                                                                    |                                                                                    |                                                                                     |                                                                                      |
|-----|------------------------------------------------------------------------------------|------------------------------------------------------------------------------------|-------------------------------------------------------------------------------------|--------------------------------------------------------------------------------------|
| Mix |   |   |   |   |
| Gel |   |   |   |   |
| MS  |  |  |  |  |

**Table 2s.** Technical photography in visible diffused light (VIS) and ultraviolet light with a wavelength of 365 nm (UV): travertine coated with the microcrystalline wax R21. CS: cleaning system.

| CS | Sample with R21 microcrystalline wax                                                |                                                                                     | After cleaning                                                                       |                                                                                       |
|----|-------------------------------------------------------------------------------------|-------------------------------------------------------------------------------------|--------------------------------------------------------------------------------------|---------------------------------------------------------------------------------------|
|    | VIS                                                                                 | UV                                                                                  | VIS                                                                                  | UV                                                                                    |
| MH |  |  |  |  |
| MO |  |  |  |  |

|     |                                                                                     |                                                                                     |                                                                                      |                                                                                       |
|-----|-------------------------------------------------------------------------------------|-------------------------------------------------------------------------------------|--------------------------------------------------------------------------------------|---------------------------------------------------------------------------------------|
| ML  |    |    |    |    |
| MM  |    |    |    |    |
| MOL |   |   |   |   |
| Mix |  |  |  |  |
| Gel |  |  |  |  |
| MS  |  |  |  |  |

**Table 3s.** Technical photography in visible diffused light (VIS) and ultraviolet light with a wavelength of 365 nm (UV): marble coated with beeswax. CS: cleaning system.

| CS      | Sample with beeswax                                                                 |                                                                                     | After cleaning                                                                       |                                                                                       |
|---------|-------------------------------------------------------------------------------------|-------------------------------------------------------------------------------------|--------------------------------------------------------------------------------------|---------------------------------------------------------------------------------------|
|         | VIS                                                                                 | UV                                                                                  | VIS                                                                                  | UV                                                                                    |
| MH      |    |    |    |    |
| MO      |    |    |    |    |
| ML      |   |   |   |   |
| MM      |  |  |  |  |
| MO<br>L |  |  |  |  |
| Mix     |  |  |  |  |

|     |  |  |  |  |
|-----|--|--|--|--|
| Gel |  |  |  |  |
| MS  |  |  |  |  |

**Table 4s.** Technical photography in visible diffused light (VIS) and ultraviolet light with a wavelength of 365 nm (UV): travertine coated with beeswax. CS: cleaning system.

| CS | Sample with beeswax |    | After cleaning |    |
|----|---------------------|----|----------------|----|
|    | VIS                 | UV | VIS            | UV |
| MH |                     |    |                |    |
| MO |                     |    |                |    |
| ML |                     |    |                |    |

|         |                                                                                     |                                                                                     |                                                                                      |                                                                                       |
|---------|-------------------------------------------------------------------------------------|-------------------------------------------------------------------------------------|--------------------------------------------------------------------------------------|---------------------------------------------------------------------------------------|
| MM      | 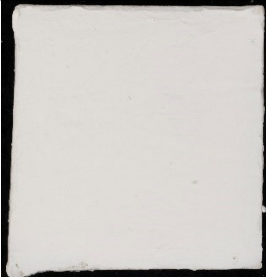   |    |    |    |
| MO<br>L |    |    |    |    |
| Mix     |   |   |   |   |
| Gel     |  |  |  |  |
| MS      |  |  |  |  |

**Table 5s.** Technical photography in visible diffused light (VIS) and ultraviolet light with a wavelength of 365 nm (UV): travertine coated with beeswax. CS: cleaning system.

| CS  | Sample coated with Paraloid™ B72                                                    | Sample coated with Paraloid™ B72 and R21 microcrystalline wax                        | After cleaning                                                                        |
|-----|-------------------------------------------------------------------------------------|--------------------------------------------------------------------------------------|---------------------------------------------------------------------------------------|
|     | VIS                                                                                 | VIS                                                                                  | VIS                                                                                   |
| MH  |    |    |    |
| MO  |   |   |   |
| ML  |  |  |  |
| MM  |  |  |  |
| MOL |  |  |  |

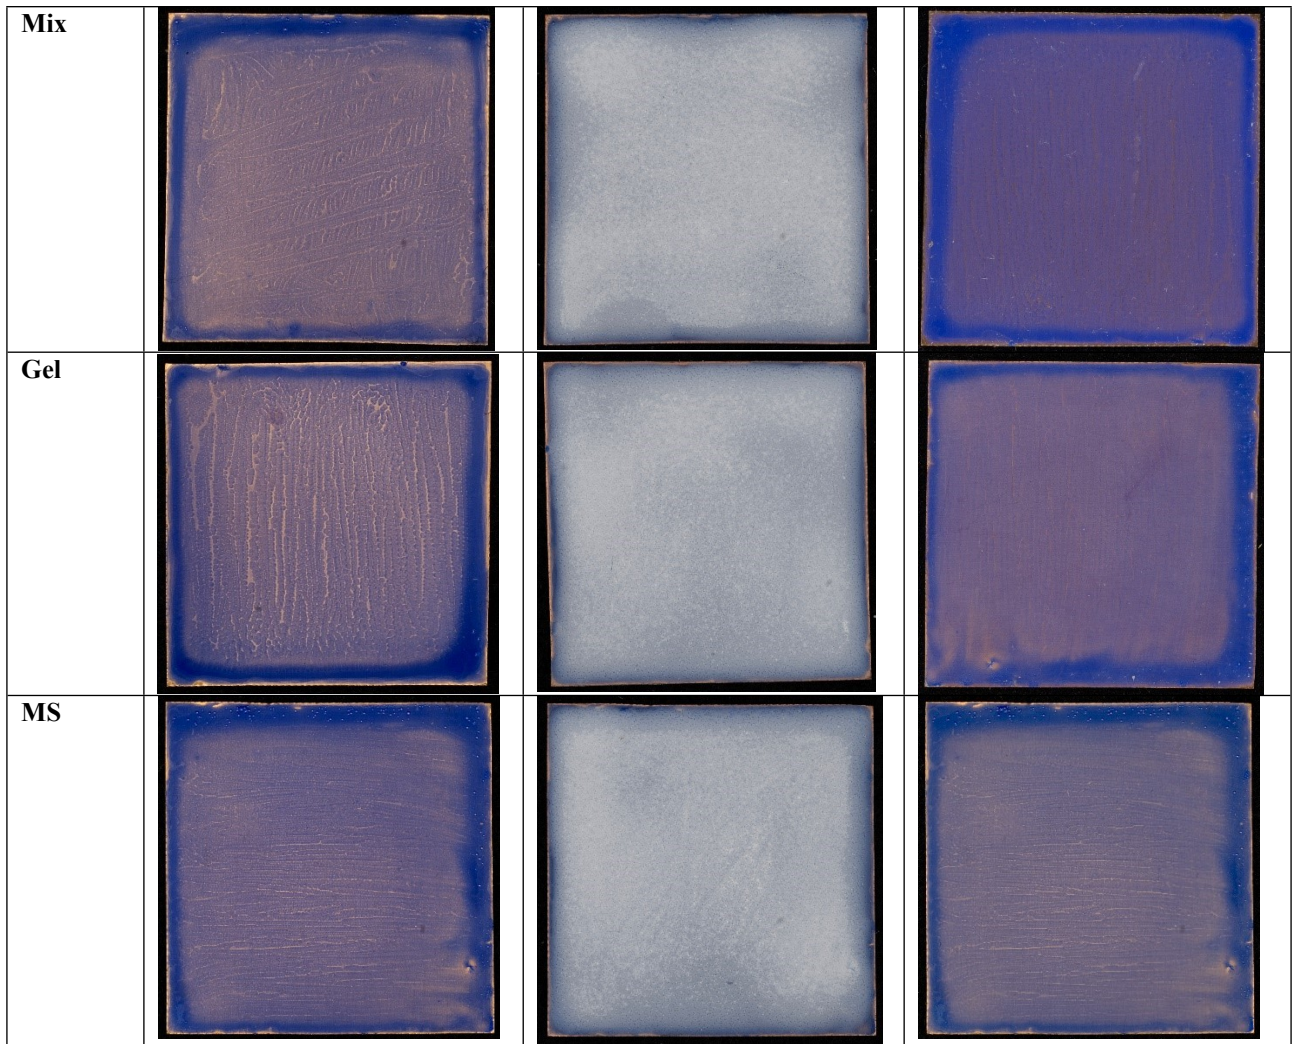

**Table 6s.** FT-IR ATR spectra: comparison between those acquired on the blank sample (red) and those acquired after the removal of the microcrystalline wax R21 from marble and travertine (green). CS: cleaning system.

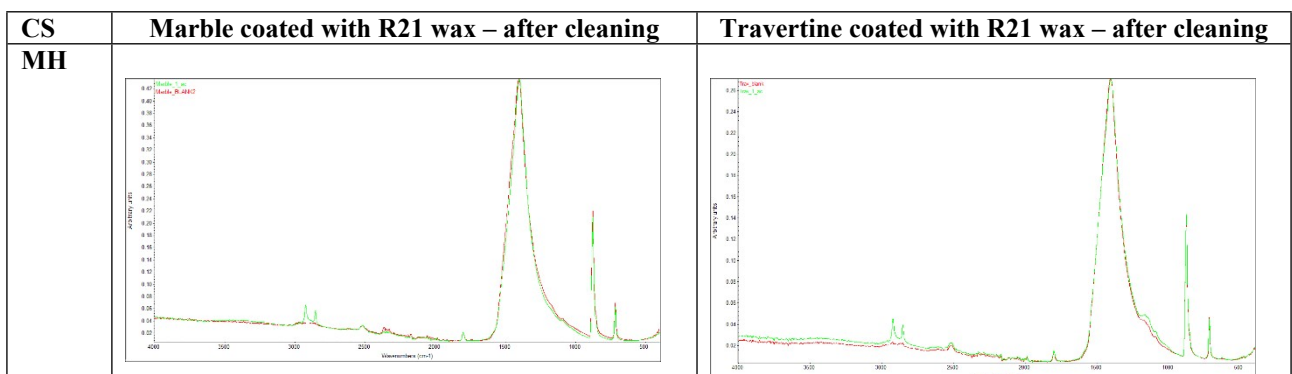



**MO**

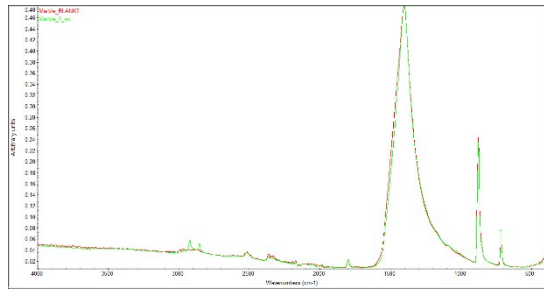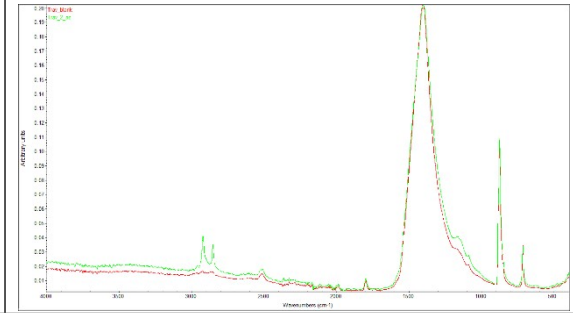

**ML**

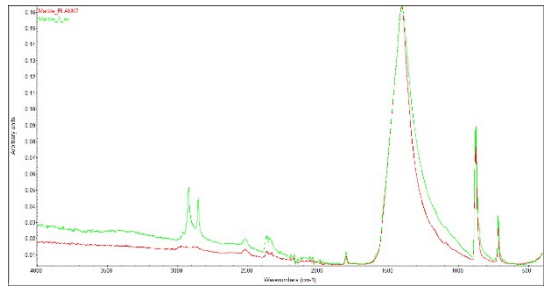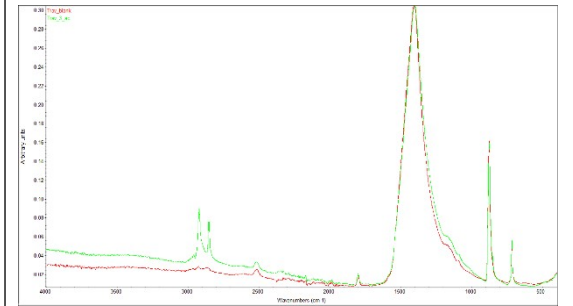

**MM**

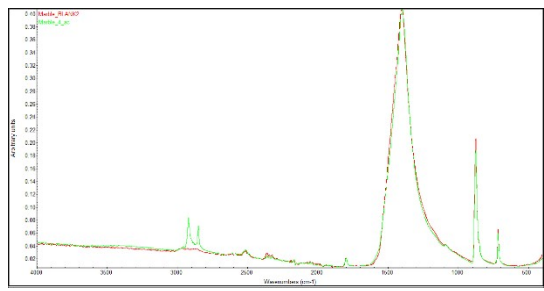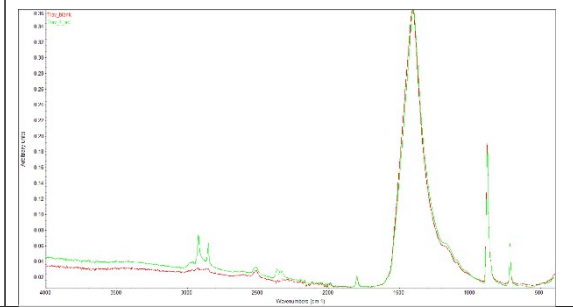

**MOL**

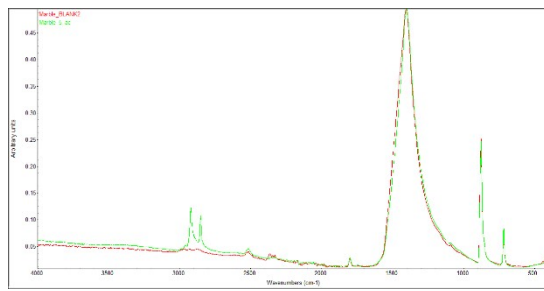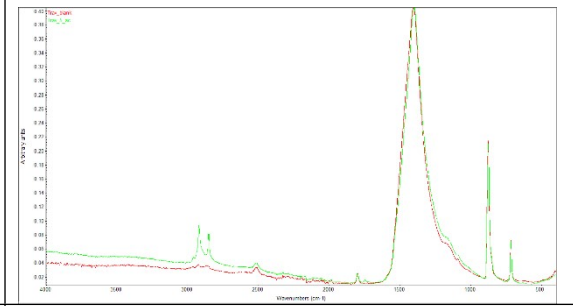

**Mix**

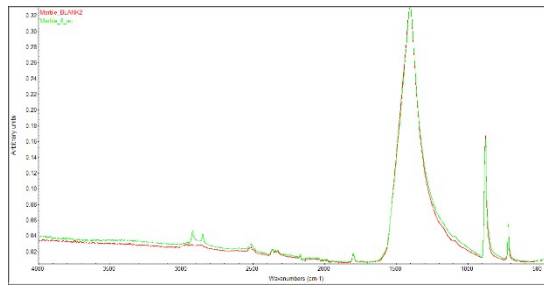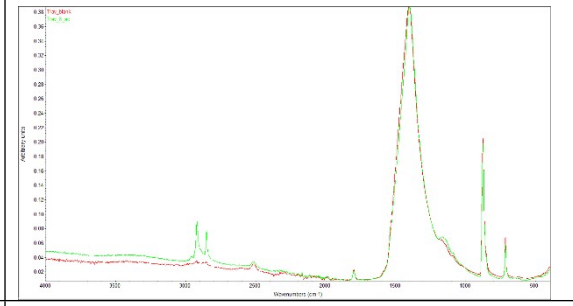

**Gel**

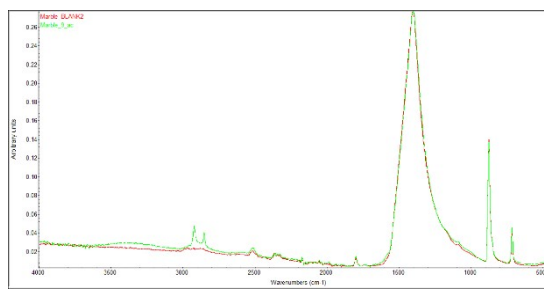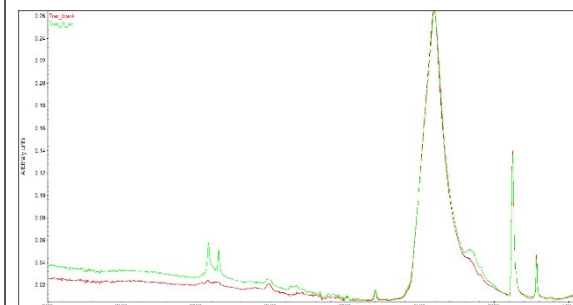

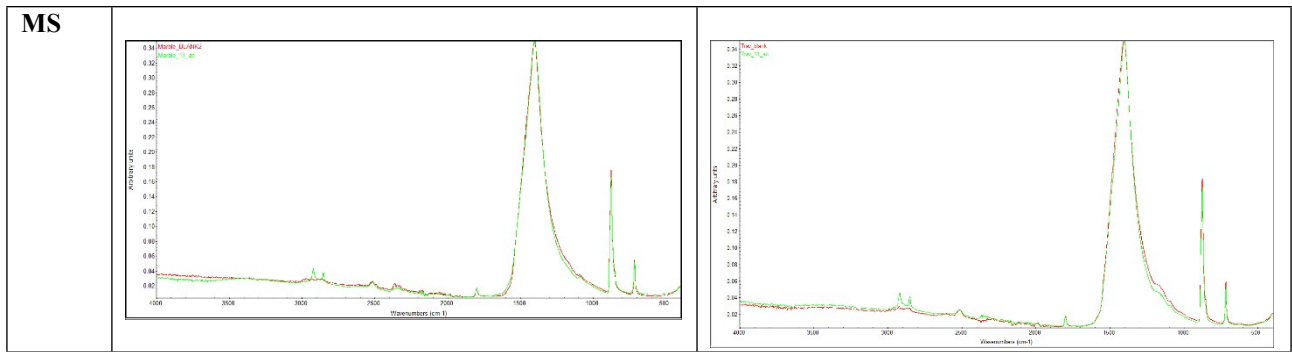

**Table 7s.** FT-IR ATR spectra: comparison between those acquired on the blank sample (red) and those acquired after the removal of beeswax from marble and travertine (green). CS: cleaning system.

| CS        | Marble coated with beeswax – after cleaning | Travertine coated beeswax – after cleaning |
|-----------|---------------------------------------------|--------------------------------------------|
| <b>MH</b> |                                             |                                            |
| <b>MO</b> |                                             |                                            |

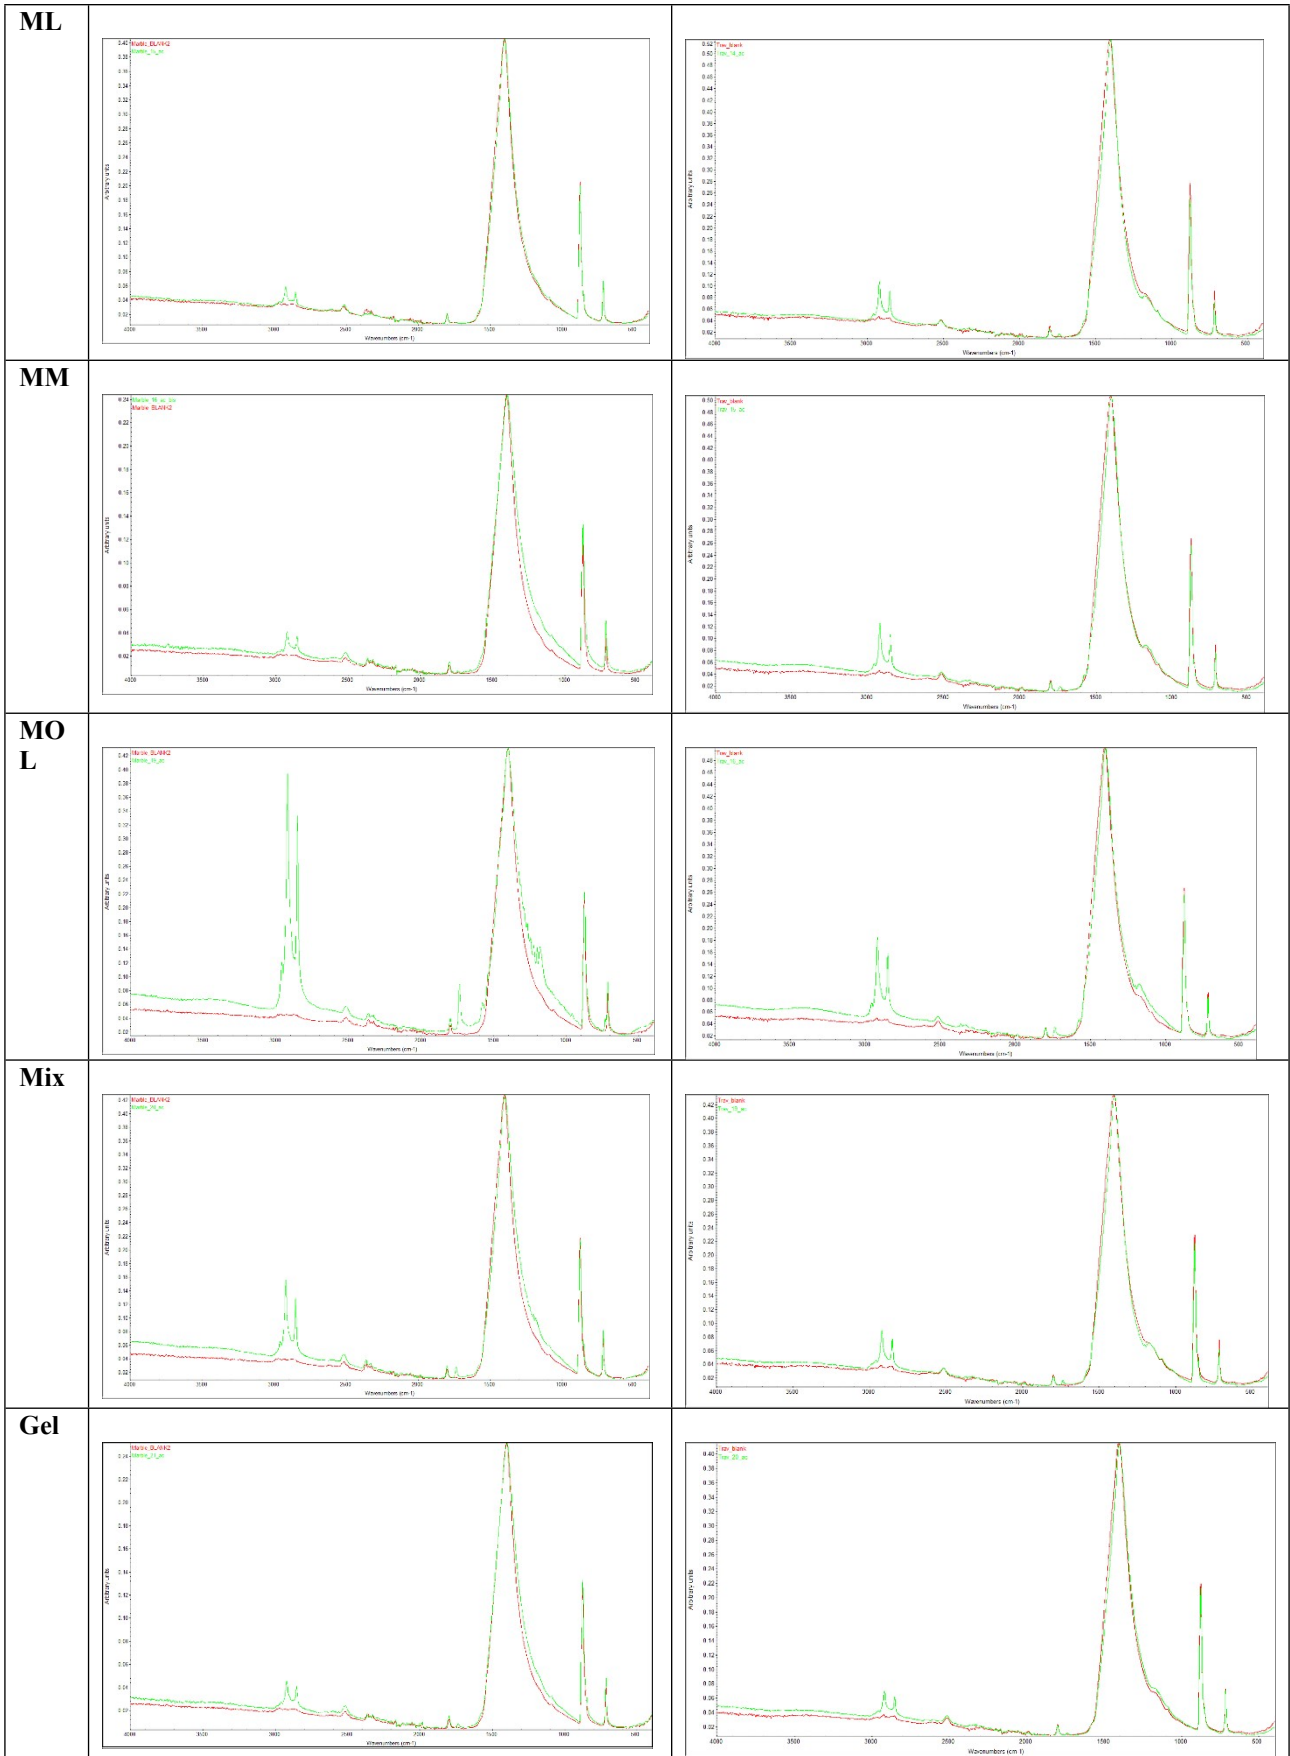

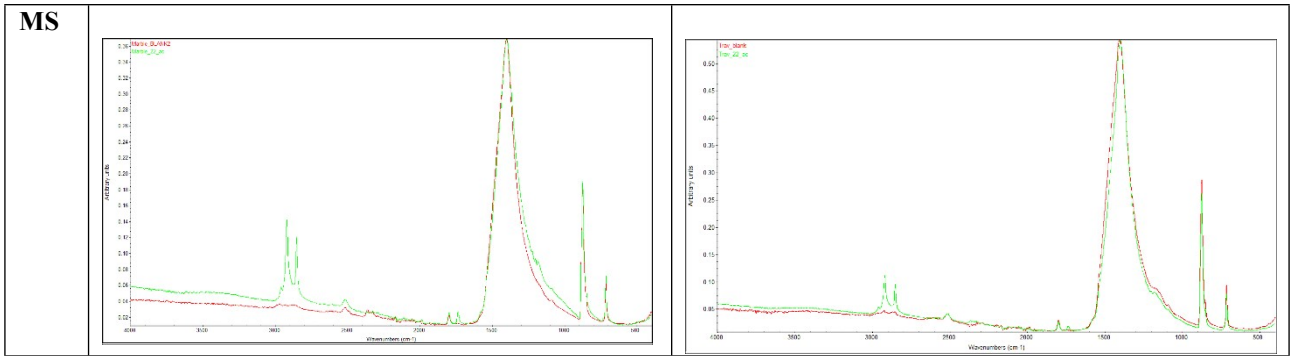

**Table 8s.** FT-IR ATR spectra: comparison between those acquired on bronze samples after the application of Paraloid™ B72 (blue), those acquired after the application of the microcrystalline wax R21 (red), and those collected after the removal of the wax (green). CS: cleaning system.

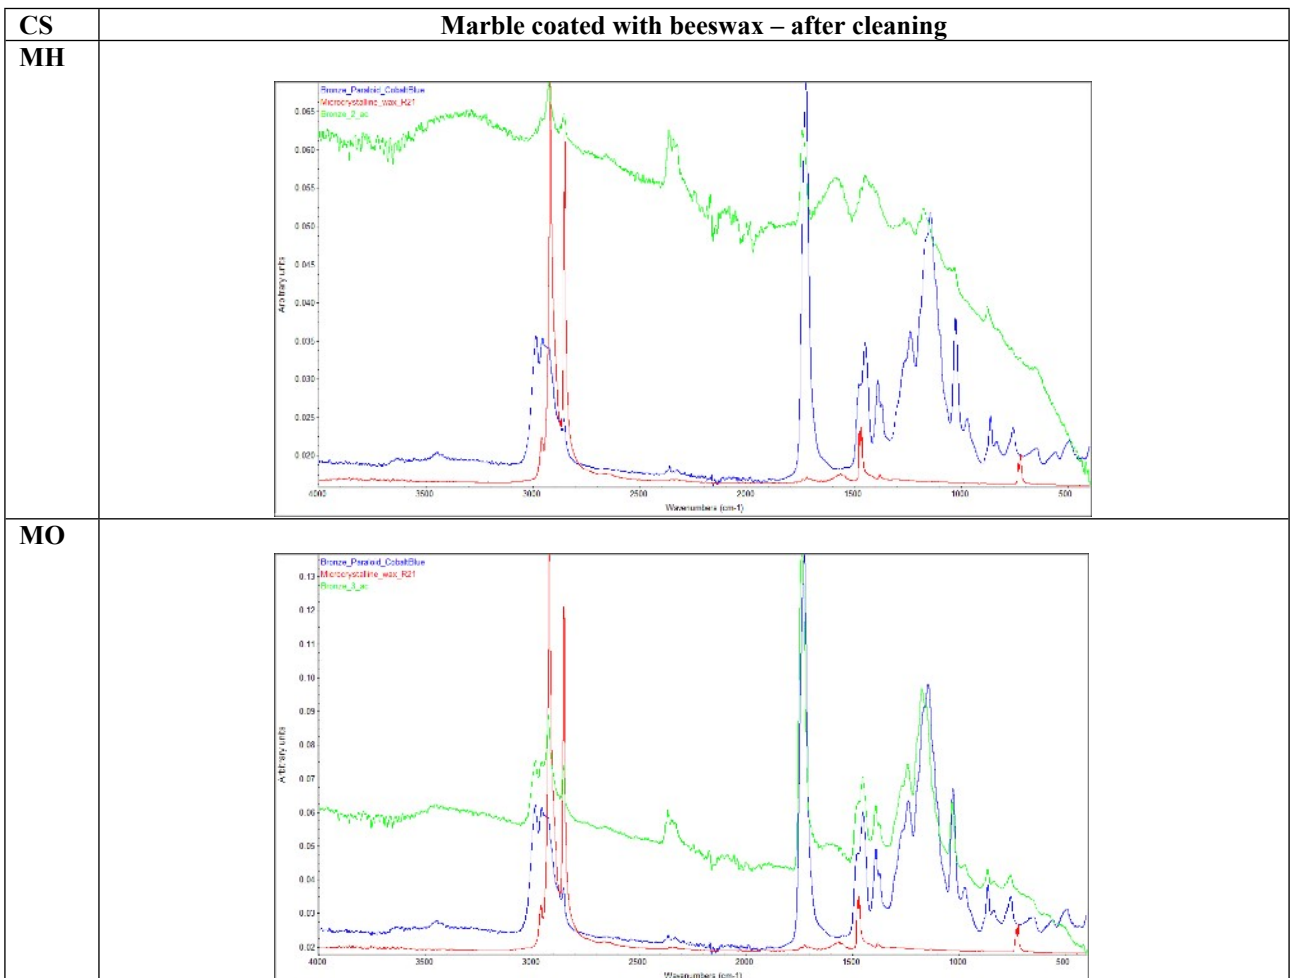

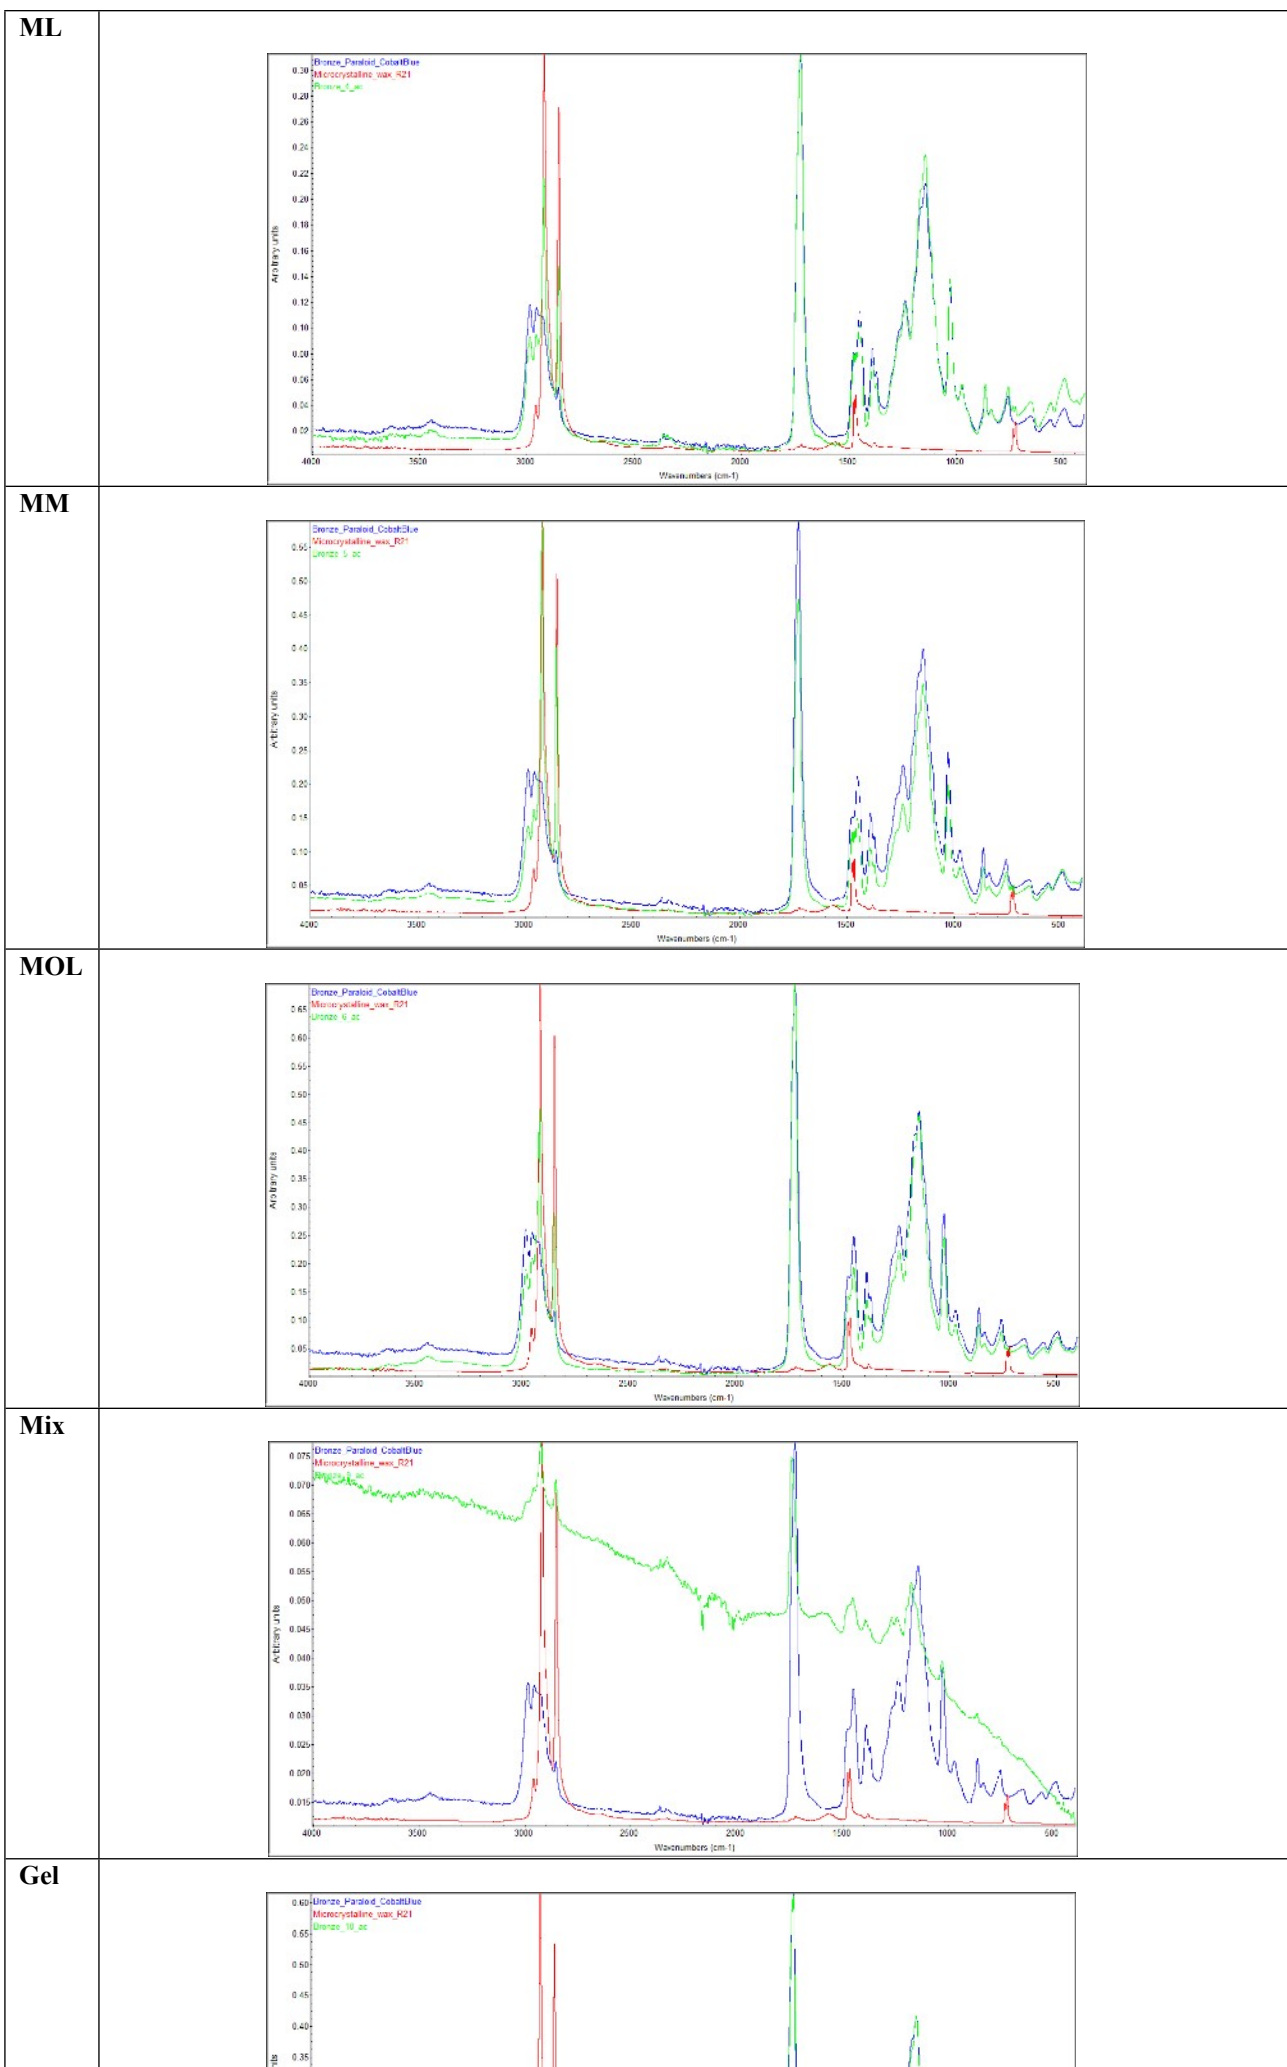

MS

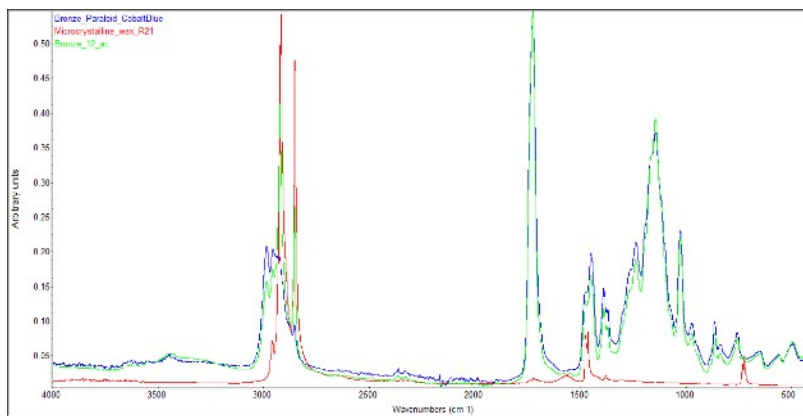

**Figure 1s.** FT-IR ATR spectra acquired on the marble sample covered with the microcrystalline wax R21, cleaned with the organogel: sample after treatment; sample after the application of the wax; organogel stored at room temperature (20 °C); single components of the organogel (methyl myristate, MM; aluminum stearate, Al stearate; Ecosurf EH-9).

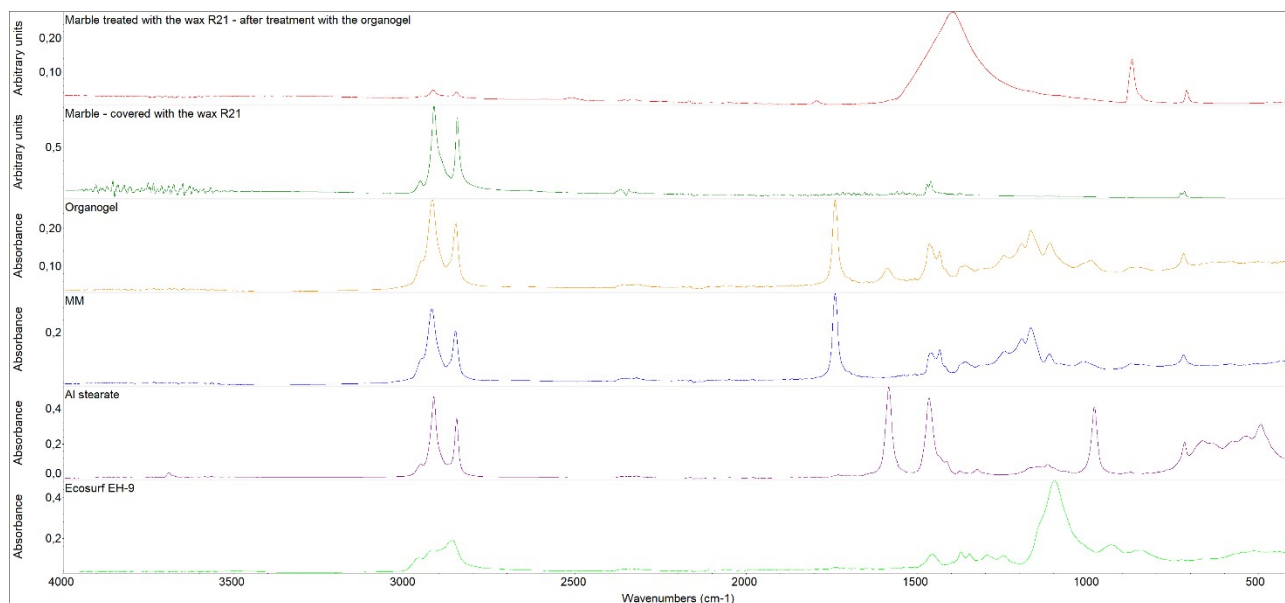

**Figure 2s.** FT-IR ATR spectra acquired on the marble sample covered with beeswax, cleaned with the organogel: sample after treatment; sample after the application of the wax; organogel stored at room temperature (20 °C); single components of the organogel (methyl myristate, MM; aluminum stearate, Al stearate; Ecosurf EH-9).

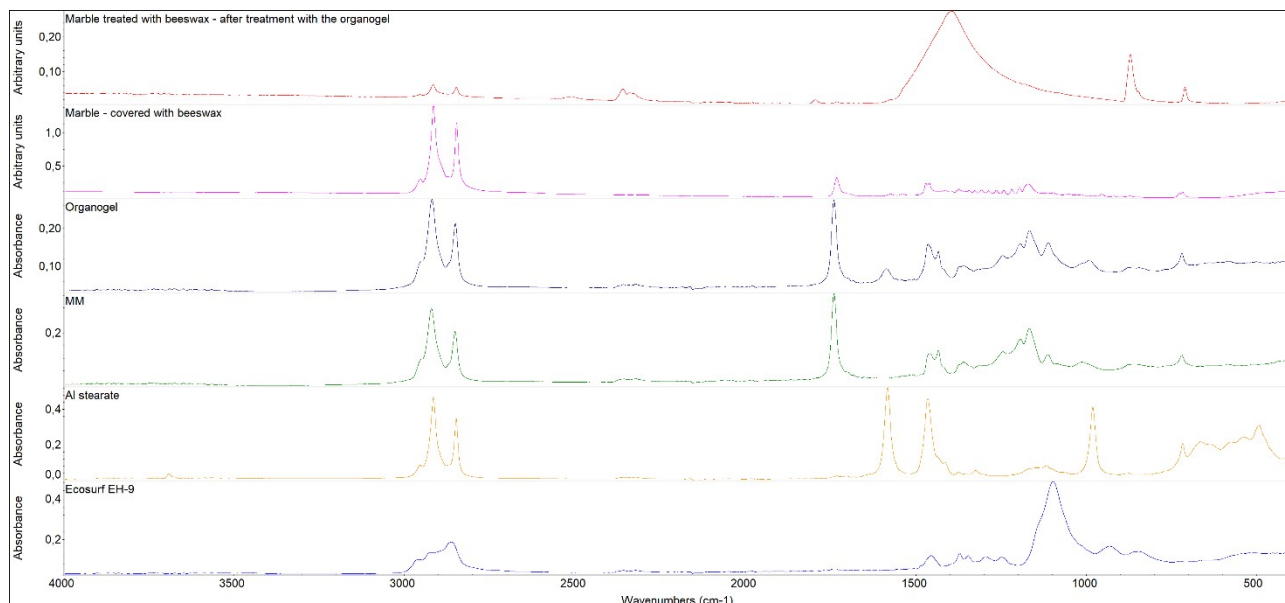

**Figure 3s.** FT-IR ATR spectra acquired on the travertine sample covered with the microcrystalline wax R21, cleaned with the organogel: sample after treatment; sample after the application of the wax; organogel stored at room temperature (20 °C); single components of the organogel (methyl myristate, MM; aluminum stearate, Al stearate; Ecosurf EH-9).

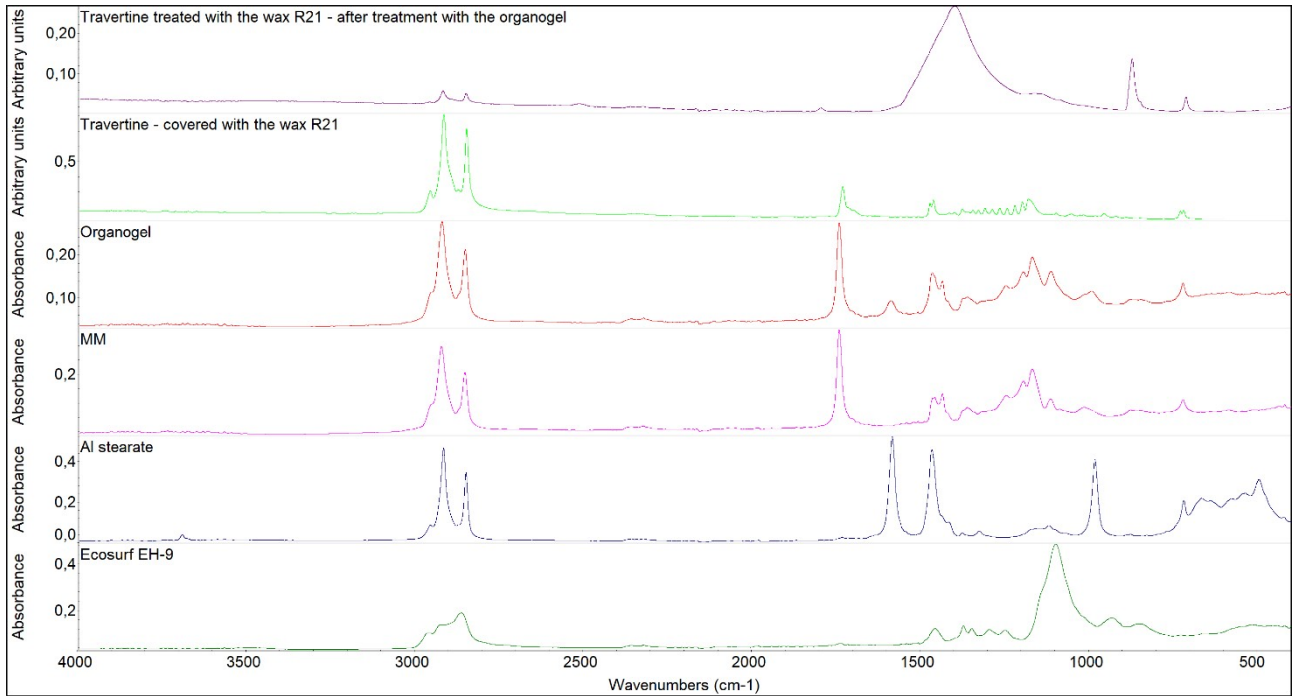

**Figure 4s.** FT-IR ATR spectra acquired on the travertine sample covered with beeswax, cleaned with the organogel: sample after treatment; sample after the application of the wax; organogel stored at room temperature (20 °C); single components of the organogel (methyl myristate, MM; aluminum stearate, Al stearate; Ecosurf EH-9).

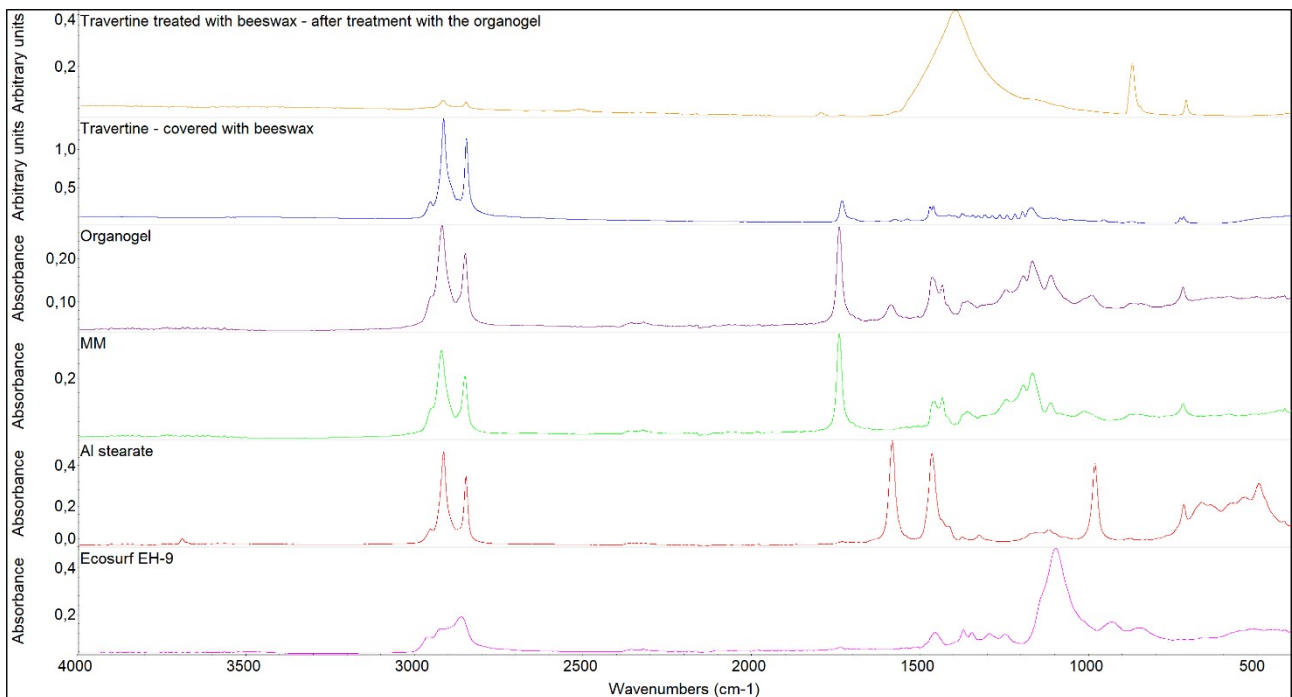



**Figure 5s.** FT-IR ATR spectra acquired on the bronze sample covered with Paraloid B72 and the microcrystalline wax R21, cleaned with the organogel: sample after treatment; sample after the application of the wax; organogel stored at room temperature (20 °C); single components of the organogel (methyl myristate, MM; aluminum stearate, Al stearate; Ecosurf EH-9).

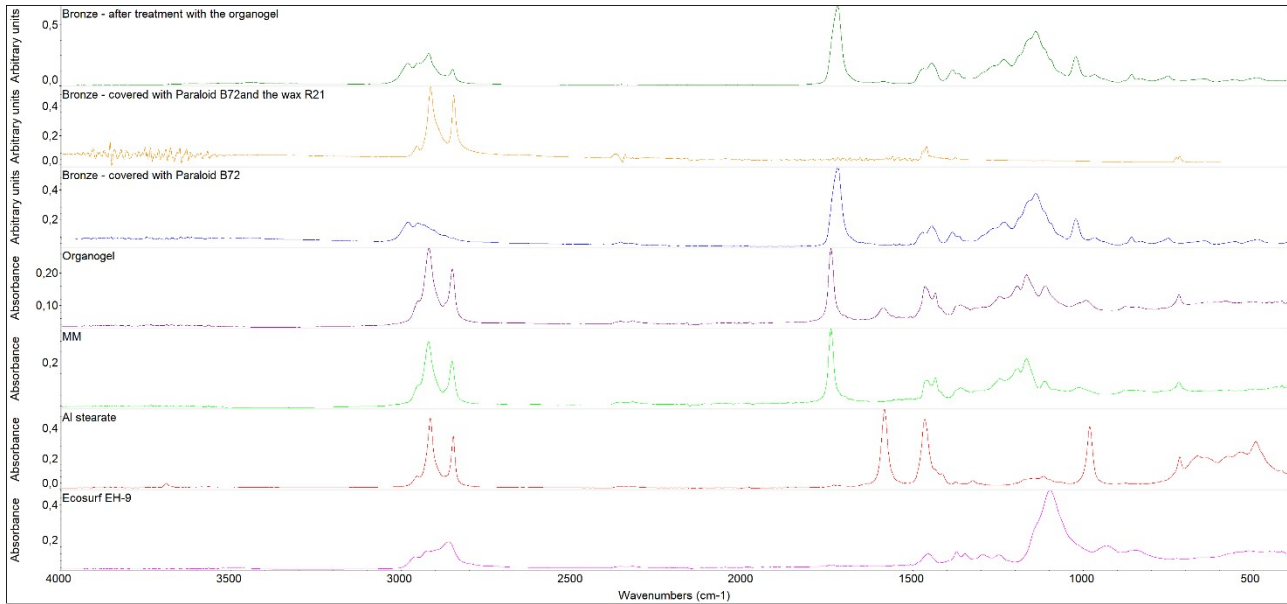

Supplement: d4ma00781f1.pdf [file d4ma00781f1.pdf]
